# Supplementary material for: Depressive symptoms among survivors of Ebola virus disease in Conakry (Guinea): preliminary results of the PostEboGui cohort
Source: Springer Nature journal article supplement (doi:10.1186/s12888-017-1280-8), 2017-04-04
Supplement: MOESM2 [file 12199692]

Identifiant Patient :

|           |  |            |  |  |              |  |  |  |  |
|-----------|--|------------|--|--|--------------|--|--|--|--|
|           |  |            |  |  |              |  |  |  |  |
| N° centre |  | N° patient |  |  | Code anonyme |  |  |  |  |

Visite n° :     Date de la visite :        Date du questionnaire :        

| Durant la semaine écoulée                                                                                                     | Jamais très<br>rarement | Occasion-<br>nellement | Assez<br>souvent | Fréquemment<br>tout le temps |
|-------------------------------------------------------------------------------------------------------------------------------|-------------------------|------------------------|------------------|------------------------------|
|                                                                                                                               | moins de<br>1 jour      | 1 à 2<br>jours         | 3 à 4<br>jours   | 5 à 7<br>jours               |
| 1. Vous avez été contrarié(e) par des choses qui d'habitude ne vous dérangent pas                                             | 0                       | 1                      | 2                | 3                            |
| 2. Vous n'avez pas eu envie de manger, vous avez manqué d'appétit                                                             | 0                       | 1                      | 2                | 3                            |
| 3. Vous avez eu l'impression que vous ne pouviez pas sortir de la tristesse, même avec l'aide de votre famille et de vos amis | 0                       | 1                      | 2                | 3                            |
| 4. Vous avez eu le sentiment d'être aussi bien que les autres                                                                 | 3                       | 2                      | 1                | 0                            |
| 5. Vous avez eu du mal à vous concentrer sur ce que vous faisiez                                                              | 0                       | 1                      | 2                | 3                            |
| 6. Vous vous êtes senti(e) déprimé(e)                                                                                         | 0                       | 1                      | 2                | 3                            |
| 7. Vous avez eu l'impression que toute action vous demandait un effort                                                        | 0                       | 1                      | 2                | 3                            |
| 8. Vous avez été confiant(e) en l'avenir                                                                                      | 3                       | 2                      | 1                | 0                            |
| 9. Vous avez pensé que votre vie était un échec                                                                               | 0                       | 1                      | 2                | 3                            |
| 10. Vous vous êtes senti(e) craintif(ve)                                                                                      | 0                       | 1                      | 2                | 3                            |
| 11. Votre sommeil n'a pas été bon                                                                                             | 0                       | 1                      | 2                | 3                            |
| 12. Vous avez été heureux(se)                                                                                                 | 3                       | 2                      | 1                | 0                            |
| 13. Vous avez parlé moins que d'habitude                                                                                      | 0                       | 1                      | 2                | 3                            |
| 14. Vous vous êtes senti(e) seul(e)                                                                                           | 0                       | 1                      | 2                | 3                            |
| 15. Les autres ont été hostiles envers vous                                                                                   | 0                       | 1                      | 2                | 3                            |
| 16. Vous avez profité de la vie                                                                                               | 3                       | 2                      | 1                | 0                            |
| 17. Vous avez eu des crises de larmes                                                                                         | 0                       | 1                      | 2                | 3                            |
| 18. Vous vous êtes senti(e) triste                                                                                            | 0                       | 1                      | 2                | 3                            |
| 19. Vous avez eu l'impression que les gens ne vous aimaient pas                                                               | 0                       | 1                      | 2                | 3                            |
| 20. Vous avez manqué d'entrain                                                                                                | 0                       | 1                      | 2                | 3                            |
| Total des points                                                                                                              |                         |                        |                  |                              |
| Score final                                                                                                                   |                         |                        |                  |                              |

Si le score du total des questions 1 à 20 est > 17 pour les hommes et > 23 pour les femmes, parlez-en au médecin référent de la personne.
