# Supplementary material for: Depressive symptoms among survivors of Ebola virus disease in Conakry (Guinea): preliminary results of the PostEboGui cohort
Source: BMC Psychiatry. 2017 Apr 4;17:127. doi: 10.1186/s12888-017-1280-8 (PMC5381039; doi:10.1186/s12888-017-1280-8)
Supplement: Supplementary file 1 — Center for Epidemiologic Studies Depression Scale (CES-D). (PDF 59 kb) [file 12888_2017_1280_MOESM1_ESM.pdf]

Patient Name: \_\_\_\_\_

Date: \_\_\_\_\_

## Center for Epidemiologic Studies Depression Scale (CES-D)

Instructions: Below is a list of the ways you might have felt or behaved. Please tell me how often you have felt this way **during the past week**.

|                                                                                          | Rarely or none of<br>the time (less than<br>1 day) | Some or a little<br>of the time (1-2<br>days) | Occasionally or a<br>moderate amount<br>of time (3-4 days) | Most or all of<br>the time (5-7<br>days) |
|------------------------------------------------------------------------------------------|----------------------------------------------------|-----------------------------------------------|------------------------------------------------------------|------------------------------------------|
| 1. I was bothered by things that usually don't bother me.                                |                                                    |                                               |                                                            |                                          |
| 2. I did not feel like eating; my appetite was poor.                                     |                                                    |                                               |                                                            |                                          |
| 3. I felt that I could not shake off the blues even with help from my family or friends. |                                                    |                                               |                                                            |                                          |
| 4. I felt I was just as good as other people.                                            |                                                    |                                               |                                                            |                                          |
| 5. I had trouble keeping my mind on what I was doing.                                    |                                                    |                                               |                                                            |                                          |
| 6. I felt depressed.                                                                     |                                                    |                                               |                                                            |                                          |
| 7. I felt that everything I did was an effort.                                           |                                                    |                                               |                                                            |                                          |
| 8. I felt hopeful about the future.                                                      |                                                    |                                               |                                                            |                                          |
| 9. I thought my life had been a failure.                                                 |                                                    |                                               |                                                            |                                          |
| 10. I felt fearful.                                                                      |                                                    |                                               |                                                            |                                          |
| 11. My sleep was restless.                                                               |                                                    |                                               |                                                            |                                          |
| 12. I was happy.                                                                         |                                                    |                                               |                                                            |                                          |
| 13. I talked less than usual.                                                            |                                                    |                                               |                                                            |                                          |
| 14. I felt lonely.                                                                       |                                                    |                                               |                                                            |                                          |
| 15. People were unfriendly.                                                              |                                                    |                                               |                                                            |                                          |
| 16. I enjoyed life.                                                                      |                                                    |                                               |                                                            |                                          |
| 17. I had crying spells.                                                                 |                                                    |                                               |                                                            |                                          |
| 18. I felt sad.                                                                          |                                                    |                                               |                                                            |                                          |
| 19. I felt that people disliked me.                                                      |                                                    |                                               |                                                            |                                          |
| 20. I could not get "going."                                                             |                                                    |                                               |                                                            |                                          |

## Scoring the CES-D

In scoring the CES-D, a value of 0, 1, 2 or 3 is assigned to a response depending upon whether the item is worded positively or negatively.

For items 1-3, 5-7, 9-11, 13-15, 17-20 the scoring is:

- Rarely or none of the time (less than one day) = 0
- Some or a little of the time (1-2 days) = 1
- Occasionally or a moderate amount of time (3-4 days) = 2
- Most or all of the time (5-7 days) = 3

Items 4, 8, 12, 16 are reverse scored as follows:

- Most or all of the time (5-7 days) = 0
- Occasionally or a moderate amount of time (3-4 days) = 1
- Some or a little of the time (1-2 days) = 2
- Rarely or none of the time (less than 1 day) = 3

Possible range of scores is 0 to 60, with the higher scores indicating the presence of more symptomatology.

Citation: Radloff LS: The CES-D Scale: a self-report depression scale for research in the general population. Applied Psychological Measurement 1:385-401, 1977.
